# Supplementary material for: Circulating Adenoid Cystic Carcinoma associated MYB transcripts enable rapid and sensitive detection of metastatic disease in blood liquid biopsies
Source: PubMed Central journal article supplement — medRxiv. 2024 Oct 17:2024.10.15.24315549. Preprint. [Version 1] doi: 10.1101/2024.10.15.24315549 (PMC11527053; doi:10.1101/2024.10.15.24315549), 2024-10-17
Supplement: NIHPP2024.10.15.24315549v1-supplement-3.pdf [file NIHPP2024.10.15.24315549v1-supplement-3.pdf]

**Supplementary Figure 1: Amplification plot of preliminary MYB primer screening on primary ACC tumor tissue.** Quant Studio 7 amplification plot output of 10 MYB primers with cDNA from ACC tumor tissue.

**Supplementary Figure 2: Primer screen on blood samples for MYB amplification in metastatic samples.** Six primer pairs spanning exons 2-8 run on control and ACC patient blood

to identify the difference between metastatic samples compared to disease free and control patients.

**Supplementary Figure 3: Relative expression of individual patients for MYB primer pair amplification of exons 2-3.** Relative expression levels of control, NED, local, and metastatic MYB whole blood levels.

**Supplementary Figure 4: Relative expression of MYB exons 14-15 in patient whole blood.** Endogenous levels of MYB in whole blood measured by the amplification of MYB exons typically lost in translocation events.

**Supplementary Figure 5: Violin plots of 30 genes overexpressed in spatial transcriptomic primary ACC tumor and circulating tumor cell cluster from blood scRNA-seq.** Violin plots of genes that are differentially expressed in both primary tumor and CTCs in blood.

**Supplementary Figure 6: Progression of MYB level in sample T5 overtime.** Relative expression of MYB in whole blood for sample T5 (February 2020), T5B (April 2021), and T5C (December 2021).

**Supplementary Figure 7: Keratin expression in different clusters from blood single-cell sequencing on metastatic ACC patient.** RNA expression for Keratins 1-30 were examined and detection of RNA for keratin 1, 2, 5, 7, 8, 10, 17, 18, and 23 was observed.

**Supplementary Figure 8: Examining Sox4 expression in whole blood via RT-qPCR.** Relative expression of Sox4 for 4 different primer pairs amplifying varying regions of the gene for control, NED, local, and metastatic disease patients.

**Supplementary Table 1: Table of primers used in RT-qPCR experiments.**

| Name   | Notes                | 5'                        | 3'                     |
|--------|----------------------|---------------------------|------------------------|
| MYB-8  | Spanning exons 2-3   | CCCAAGTCTGGAAAGCGTCA      | TTCATCCTCTTCCCGGGTCC   |
| MYB-12 | Spanning exons 14-15 | ATGGCACCAGCATCAGAAGA      | AGGATGCAGGTTCCAGGTA    |
| MYB-1  | Spanning exons 3-4   | AGCTGGTGGAAACAGAATGGA     | GTACTTTCTGCCATCGGTGC   |
| MYB-2  | Spanning exons 3-4   | AGCTGGTGGAAACAGAATGGAA    | ACTTTCTGCCATCGGTGCTG   |
| MYB-3  | Spanning exons 4-5   | CCTGAGCTCATCAAGGGTCC      | ACCAACGTTTCGGACCGTATT  |
| MYB-4  | Spanning exons 4-5   | CCCTGAGCTCATCAAGGGTC      | AACAGACCAACGTTTCGGAC   |
| MYB-6  | Spanning exons 5-6   | ATGGGCAGAAATCGCAAAGC      | CCTTCCTGTTTCGACCTCCG   |
| MYB-7  | Spanning exons 6-7   | CAGCCCACTGTTAACAACGAC     | CAGCTGGCTGAGGGACATTG   |
| MYB-9  | Spanning exons 7-8   | TGCTCCTAATGTCAACCGAG      | CATGTGTGGTTCTGTGTTGGTA |
| MYB-10 | Spanning exons 5-6   | ATGGGCAGAAATCGCAAAGC      | CGACCTTCGACGCATTGTA    |
| MYB-11 | Spanning exons 7-8   | AGTCAATGTCCCTCAGCCAG      | CGCTTTTCCTTCTCAGGGTCT  |
| UBE2D2 | Normalizing gene     | GTA CTCTTGTCCATCTGTTCTCTG | CCATTCCCGAGCTATTCTGTT  |
| RPS18  | Normalizing gene     | GTTCCAGCATATTTTTCGAGT     | GTCAATGTCTGCTTTCCTCAAC |
